# Supplementary material
Source: PubMed Central journal article supplement (PMC1618452)
Supplement: bmj_333_7573_856__1.pdf [file bmj_333_7573_856__1.pdf]

Timeline of outbreaks of avian flu in the Middle East and details of cooperation between the parties involved

| <b>Avian flu event</b>                                                                                                           | <b>Date</b>    | <b>Regional cooperation</b>                                                                                         | <b>Parties involved</b>                                                                           |
|----------------------------------------------------------------------------------------------------------------------------------|----------------|---------------------------------------------------------------------------------------------------------------------|---------------------------------------------------------------------------------------------------|
|                                                                                                                                  | 23 Nov 2005    | Meeting at the Jordan-Israel border crossing                                                                        | Jordan, Israel, Palestinian Authority                                                             |
|                                                                                                                                  | 14-16 Dec 2005 | The Istanbul conference attended by senior officials from health and agriculture ministries                         | Jordan, Israel, Palestinian Authority, Egypt; experts from WHO and US Centers for Disease Control |
|                                                                                                                                  | 17 Jan 2006    | Coordination meeting in Beth-El (Israel) attended by top officials from health and agriculture ministries           | Israel, Palestinian Authority                                                                     |
|                                                                                                                                  | 16 Feb 2006    | Coordination meeting on avian and pandemic influenza at the Jordan-Israel border crossing                           | Jordan, Israel, Palestinian Authority; health specialists from the World Bank                     |
| 1st outbreak in poultry in Egypt                                                                                                 | 17 Feb 2006    |                                                                                                                     |                                                                                                   |
| 1st outbreak in Israel. Four industrial turkey coops: 2 bordering the Gaza Strip, 1 near Jerusalem, and 1 between these two foci | 16-17 Mar 2006 |                                                                                                                     |                                                                                                   |
| Outbreak in an Israeli industrial coop close to the Gaza Strip                                                                   | 19 Mar 2006    | Meeting of public health officials                                                                                  | Israel, Palestinian Authority                                                                     |
| Outbreak in an Israeli industrial coop close to the Gaza Strip                                                                   | 20 Mar 2006    | Meeting of senior officials from Israeli and Palestinian Authority veterinary services                              | Israel, Palestinian Authority                                                                     |
| Report of excessive death in a coop east of Gaza city, Palestinian Authority                                                     | 21 Mar 2006    | Samples from Gaza sent to the Israeli veterinary laboratory                                                         | Israel, Palestinian Authority                                                                     |
| Outbreak in an Israeli industrial coop near the Jordan Valley                                                                    | 22 Mar 2006    | Meeting at Gaza crossing                                                                                            | Israel, Palestinian Authority                                                                     |
|                                                                                                                                  | 23 Mar 2006    | Transfer of equipment for personal protection, Tamiflu, and culling poison to the Palestinian side at Gaza crossing | Israel, Palestinian Authority                                                                     |
| Outbreak in backyard                                                                                                             | 24 Mar 2006    |                                                                                                                     |                                                                                                   |

|                                                                                |             |                                   |                                                             |
|--------------------------------------------------------------------------------|-------------|-----------------------------------|-------------------------------------------------------------|
| turkeys in Jordan                                                              |             |                                   |                                                             |
|                                                                                | 27 Mar 2006 | Coordination meeting in Jerusalem | Jordan, Israel, Palestinian Authority, Egypt, WHO officials |
| Outbreak in an Israeli industrial coop near Jerusalem                          | 28 Mar 2006 |                                   |                                                             |
| Outbreak in an Israeli industrial coop near the Gaza Strip and Egyptian border | 30 Mar 2006 |                                   |                                                             |
